# Supplementary material
Source: publisher site journal article supplement (https://www.dovepress.com/article/295309)
Supplement: Supplementary file 1 [file get_supplementary_file.php]

Prospective clinical evaluation of intra-articular injection of Tin-117m (117mSn) radiosynoviorthesis agent for management of naturally occurring elbow osteoarthritis in dogs: A pilot study

Aulakh et al.

**Supplementary material (online)**

**Supplementary Table 1:** Dosage chart for dogs in the study to the nearest 10 lbs body weight. Dose was normalized to body surface area relative to that of a 50 lb dog.

| **Weight of dog** | **1.0 mCi** | **1.75 mCi** | **2.5 mCi** |
| --- | --- | --- | --- |
| 20 lbs. | .54 | .95 | 1.35 |
| 30 lbs. | .71 | 1.24 | 1.77 |
| 40 lbs. | .86 | 1.51 | 2.15 |
| 50 lbs. | 1.0 | 1.75 | 2.50 |
| 60 lbs. | 1.13 | 1.97 | 2.83 |
| 70 lbs. | 1.25 | 2.19 | 3.13 |
| 80 lbs. | 1.37 | 2.39 | 3.43 |
| 90 lbs. | 1.48 | 2.59 | 3.70 |
| 100 lbs. | 1.59 | 2.78 | 3.98 |
| 110 lbs. | 1.70 | 2.97 | 4.25 |
| 120 lbs. | 1.79 | 3.13 | 4.73 |
| 130 lbs. | 1.89 | 3.31 | 4.73 |
| a140 lbs. | 1.98 | 3.48 | 4.97 |

a Dose was capped at 5 mCi when weight exceeded 140 lbs.

*mCi* millicuries

**Supplementary Table 2:** Duration of OA and medical management for study population. The administration of medications was tracked by posing a question to owners at each recheck.

| **Dose-gp** | **Dog #** | **Breeds** | ***Duration of clinical symptoms of OA (months)** | **NSAID** | | **Nutraceuticals and/or other medications for arthritis/pain** | |
| --- | --- | --- | --- | --- | --- | --- | --- |
| **At enrollment** | **During the study** | **At enrollment** | **During the study** |
| LD | 1 | Beagle mix | 36 | firocoxib as needed | firocoxib as needed | glycoflex,  polysulfated glycosaminoglycan (PSGAG),  injections | glycoflex,  PSGAG injections stopped 4 months after starting study |
| 2 | Dogue de Bordeaux | 19 | none | none | gabapentin, glucosamine + chondroitin, brewer’s yeast | gabapentin, glucosamine + chondroitin, brewer’s yeast |
| 3 | Golden Retriever Mix | 9 | none | none | none | none |
| 4 | Labrador Retriever | 7 | none | ‡carprofen started 8 months after enrollment and continued through remainder of the study | fish oil (omega 3 fatty acids), glucosamine | fish oil (omega 3 fatty acids), glucosamine |
| 5 | Labrador Retriever | 9 | none | ‡carprofen only between month 7 and 8 | none | none |
| 6 | Mix | 24 | none | none | none | ‡fatty acids (from New Zealand green-lipped muscle) started after 3 mo evaluation |
| 7 | Newfoundland | 12 | none | none | fish oil (omega 3 fatty acids) | ‡fish oil (omega 3 fatty acids) stopped after 3-mo evaluation |
| MD | 8 | American Bulldog mix | 8 | none | none | fish oil (omega 3 fatty acids), joint mobility diet | fish oil (omega 3 fatty acids), joint mobility diet |
| 9 | German Shepherd | 25 | meloxicam as needed | meloxicam as needed | glucosamine + chondroitin + methyl-sulfonylmethane | glucosamine + chondroitin + methyl-sulfonylmethane |
| 10 | Golden Retriever | 37 | carprofen as needed | carprofen as needed | gabapentin | gabapentin |
| 11 | Great Dane | 4 | none | none | none | none |
| 12 | Labrador Retriever Mix | 1 | none | none | gabapentin | gabapentin |
| 13 | Labrador Retriever Mix | 8 | none | none | none | none |
| HD | 14 | Bulldog/ Dalmatian mix | 12 | none | none | none | none |
| 15 | German Shepherd | 9 | none | none | fish oil (omega 3 fatty acids) | ‡fish oil (omega 3 fatty acids) stopped after 3mo evaluation) |
| 16 | Irish Soft Coated Wheaten Terrier | 3 | deramaxx as needed | ‡deramaxx discontinued a week before 3mo evaluation | none | none |
| 17 | Labrador Mastiff Mix | 3 | none | none | glucosamine + chondroitin, fish oil (omega 3 fatty acids) | glucosamine + chondroitin, fish oil (omega 3 fatty acids) |
| 18 | Labrador Retriever | 6 | firocoxib as needed | firocoxib as needed | fatty acids (from New Zealand green-lipped mussel) | fatty acids (from New Zealand green-lipped mussel) |
| 19 | Labrador Retriever | 27 | none | none | glucosamine + chondroitin PSGAG inj. monthly | glucosamine + chondroitin PSGAG inj. monthly |
| 20 | Mix | 6 | none | none | joint diet | joint diet until 6 mo follow up |
| 21 | Rhodesian Ridgeback mix | 12 | carprofen as needed | carprofen as needed | glucosamine + chondroitin | glucosamine + chondroitin |

*As reported by the owner

Note: Dogs being treated with nutraceuticals and/or medications such as NSAIDs were eligible provided they still had lameness or pain localizable to one or both elbow/s. Most dogs were on stable dose of medications for OA i.e. nutraceuticals and/or other medications such as non-steroidal analgesic drugs (NSAID) and/or non-NSAID pain medications for at least 2 weeks prior to the start of the study, and throughout the study duration. ‡There were few exceptions as shown above.
